# Supplementary material
Source: MDPI journal article supplement (https://www.mdpi.com/2071-1050/12/10/4307)
Supplement: s1 [file s1]

# A Comprehensive Model to Explain Europeans' Environmental Behaviors

Öykü Hazal Aral and Jordi López-Sintas

## Supplementary Materials

**Table S1.** Descriptive statistics for the individual-level environmental factors.

| Item                                                                                                      | Mean | SD   | Skewness | Kurtosis |
|-----------------------------------------------------------------------------------------------------------|------|------|----------|----------|
| QD5.1 As an individual, you can play a role in protecting the environment in (country).                   | 3.32 | 0.74 | −0.97    | 0.68     |
| QD5.2 The big polluters should be mainly responsible for making good the environmental damage they cause. | 3.65 | 0.57 | −1.59    | 2.62     |
| QD5.3 Environmental issues have a direct effect on your daily life                                        | 3.25 | 0.79 | −.88     | 0.28     |
| QD5.4 You are worried about the impact on your health of everyday products made of plastic.               | 3.13 | 0.86 | −0.74    | −0.17    |
| QD5.5 You are worried about the impact on the environment of everyday products made of plastic            | 3.38 | 0.72 | −1.07    | 0.95     |
| QD5.6 You are worried about the impact on your health of chemicals present in everyday products.          | 3.34 | 0.77 | −1.07    | 0.71     |
| QD5.7 You are worried about the impact on the environment of chemicals present in everyday products       | 3.43 | 0.7  | −1.15    | 1.16     |
| QD9.1 EU environmental legislation is necessary to protect the environment in (country).                  | 3.28 | 0.77 | −0.97    | 0.67     |
| QD9.2 The EU should be able to check that EU environmental laws are being applied correctly in (country). | 3.29 | 0.77 | −1.02    | 0.78     |
| QD9.3 The EU should assist non-EU countries to improve their environmental standards.                     | 3.29 | 0.77 | −1.02    | 0.84     |
| QD15.1 Local authorities should provide more and better collection facilities for plastic waste           | 3.5  | 0.65 | −1.22    | 1.45     |
| QD15.2 People should be educated on how to reduce their plastic waste                                     | 3.5  | 0.67 | −1.31    | 1.57     |
| QD15.4 Industry and retailers should make an effort to reduce plastic packaging                           | 3.6  | 0.6  | −1.47    | 2.21     |
| QD15.5 Products should be designed in a way that facilitates the recycling of plastic                     | 3.64 | 0.58 | −1.54    | 2.44     |

Mean inter-item correlation = 0.305, Cronbach's  $\alpha$  = 0.859.

## Results of the common variance method tests

*a) Harman's single factor test with no rotation*

Eco-friendly purchasing: 1<sup>st</sup> factor explains 29% of variance

Public transport use: 1<sup>st</sup> factor explains 30% of variance

Reduced resource consumption: 1st factor explains 30% of variance

*b) Cross-loading examinations*

c)

**Table S2.** Exploratory factor analysis for the main constructs of the responsible environmental behavior (REB) model plus environmental behaviors with varimax rotation (extraction method: principal component analysis).

| Items                                                                                                      | Factor loadings |            |            |            |            |
|------------------------------------------------------------------------------------------------------------|-----------------|------------|------------|------------|------------|
|                                                                                                            | Factor (1)      | Factor (2) | Factor (3) | Factor (4) | Factor (5) |
| <b>Environmental factors and eco-friendly purchase behavior items</b>                                      |                 |            |            |            |            |
| QD5.4. You are worried about the impact on your health of everyday products made of plastic.               | 0.81            |            |            |            |            |
| QD5.6. You are worried about the impact on your health of chemicals present in everyday products.          | 0.83            |            |            |            |            |
| QD5.7. You are worried about the impact on the environment of chemicals present in everyday products.      | 0.80            |            |            |            |            |
| QD5.3. Environmental issues have a direct effect on your daily life.                                       | 0.74            |            |            |            |            |
| QD5.5. You are worried about the impact on the environment of everyday products made of plastic.           | 0.76            |            |            |            |            |
| QD15.1. Local authorities should provide more and better collection facilities for plastic waste.          | -               | 0.70       |            |            |            |
| QD15.2. People should be educated on how to reduce their plastic waste.                                    | -               | 0.69       |            |            |            |
| QD15.5. Products should be designed in a way that facilitates the recycling of plastic.                    | -               | 0.79       |            |            |            |
| QD15.4. Industry and retailers should make an effort to reduce plastic packaging.                          | -               | 0.77       |            |            |            |
| QD9.2. The EU should be able to check that EU environmental laws are being applied correctly in (country). | -               |            | 0.84       |            |            |
| QD9.1. EU environmental legislation is necessary to protect the environment in (country).                  | -               |            | 0.84       |            |            |
| QD9.3. The EU should assist non-EU countries to improve their environmental standards.                     | -               |            | 0.69       |            |            |
| QD5.2. The big polluters should be mainly responsible for making good the environmental damage they cause. | -               |            |            |            |            |
| QD5.1. As an individual, you can play a role in protecting the environment in (country).                   | 0.46            |            |            |            |            |
| QD4.2. Avoided buying overpackaged products                                                                |                 |            |            | 0.54       |            |
| QD4.3. Avoiding single-use plastic goods other than plastic bags or bought reusable plastic products       |                 |            |            | 0.76       |            |
| QD4.8. Buying local products                                                                               |                 |            |            |            | 0.81       |
| QD4.7. Buying products marked with an environmental label                                                  |                 |            |            |            | 0.54       |
| <b>Environmental factors and public transport behavior items</b>                                           |                 |            |            |            |            |
| QD5.4. You are worried about the impact on your health of everyday products made of plastic.               | 0.83            |            |            |            |            |
| QD5.6. You are worried about the impact on your health of chemicals present in everyday products.          | 0.83            |            |            |            |            |
| QD5.7. You are worried about the impact on the environment of chemicals present in everyday products.      | 0.77            |            |            |            |            |
| QD5.3. Environmental issues have a direct effect on your daily life.                                       | 0.75            |            |            |            |            |
| QD5.5. You are worried about the impact on the environment of everyday products made of plastic.           | 0.73            |            |            |            |            |
| QD15.1. Local authorities should provide more and better collection facilities for plastic waste.          |                 | 0.77       |            |            |            |
| QD15.2. People should be educated on how to reduce their plastic waste.                                    |                 | 0.75       |            |            |            |
| QD15.5. Products should be designed in a way that facilitates the recycling of plastic.                    |                 | 0.70       |            |            |            |
| QD15.4. Industry and retailers should make an effort to reduce plastic packaging.                          |                 | 0.68       |            |            |            |
| QD9.2. The EU should be able to check that EU environmental laws are being applied correctly in (country). |                 |            | 0.84       |            |            |
| QD9.1. EU environmental legislation is necessary to protect the environment in (country).                  |                 |            | 0.84       |            |            |

|                                                                                                                                                              |                   |                   |                   |                   |                   |
|--------------------------------------------------------------------------------------------------------------------------------------------------------------|-------------------|-------------------|-------------------|-------------------|-------------------|
| QD9.3. The EU should assist non-EU countries to improve their environmental standards.                                                                       | 0.70              |                   |                   |                   |                   |
| QD5.2. The big polluters should be mainly responsible for making good the environmental damage they cause.                                                   |                   | 0.75              |                   |                   |                   |
| QD5.1. As an individual, you can play a role in protecting the environment in (country).                                                                     |                   | 0.48              |                   |                   |                   |
| QD19.3. Frequently using public transport or biking or walking instead of using a car                                                                        |                   |                   | 0.79              |                   |                   |
| QD4.1. Choosing more environmentally friendly travel (walking, biking, public transport)                                                                     |                   |                   | 0.77              |                   |                   |
| QD4.9. Using your car less by avoiding unnecessary trips                                                                                                     |                   |                   |                   | 0.63              |                   |
| <b>Environmental factors and reduction of resources behavior items</b>                                                                                       | <b>Factor (1)</b> | <b>Factor (2)</b> | <b>Factor (3)</b> | <b>Factor (4)</b> | <b>Factor (5)</b> |
| QD5.4. You are worried about the impact on your health of everyday products made of plastic.                                                                 | 0.80              |                   |                   |                   |                   |
| QD5.6. You are worried about the impact on your health of chemicals present in everyday products.                                                            | 0.83              |                   |                   |                   |                   |
| QD5.7. You are worried about the impact on the environment of chemicals present in everyday products.                                                        | 0.81              |                   |                   |                   |                   |
| QD5.3. Environmental issues have a direct effect on your daily life.                                                                                         | 0.74              |                   |                   |                   |                   |
| QD5.5. You are worried about the impact on the environment of everyday products made of plastic.                                                             | 0.74              |                   |                   |                   |                   |
| QD15.1. Local authorities should provide more and better collection facilities for plastic waste.                                                            |                   | 0.69              |                   |                   |                   |
| QD15.2. People should be educated on how to reduce their plastic waste.                                                                                      |                   | 0.69              |                   |                   |                   |
| QD15.5. Products should be designed in a way that facilitates the recycling of plastic.                                                                      |                   | 0.80              |                   |                   |                   |
| QD15.4. Industry and retailers should make an effort to reduce plastic packaging.                                                                            |                   | 0.78              |                   |                   |                   |
| QD9.2. The EU should be able to check that EU environmental laws are being applied correctly in (country).                                                   |                   |                   | 0.84              |                   |                   |
| QD9.1. EU environmental legislation is necessary to protect the environment in (country).                                                                    |                   |                   | 0.84              |                   |                   |
| QD9.3. The EU should assist non-EU countries to improve their environmental standards.                                                                       |                   |                   | 0.69              |                   |                   |
| QD5.2. The big polluters should be mainly responsible for making good the environmental damage they cause.                                                   | 0.47              |                   |                   |                   |                   |
| QD5.1. As an individual, you can play a role in protecting the environment in (country).                                                                     | 0.47              |                   |                   |                   |                   |
| QD4.5. Cutting down on water consumption                                                                                                                     |                   |                   |                   | 0.90              |                   |
| QD4.6. Cutting down on energy consumption (turning down air conditioning or heating, not leaving appliances on stand-by, buying energy-efficient appliances) |                   |                   |                   | 0.62              |                   |
| QD19.2. Replacing older energy-intensive equipment (hotwater boiler, oven, dishwasher, etc) with more energy efficient equipment (e.g., labelled A+++)       |                   |                   |                   | 0.82              |                   |

Note: Items with factor loading lower than .04 are not shown.

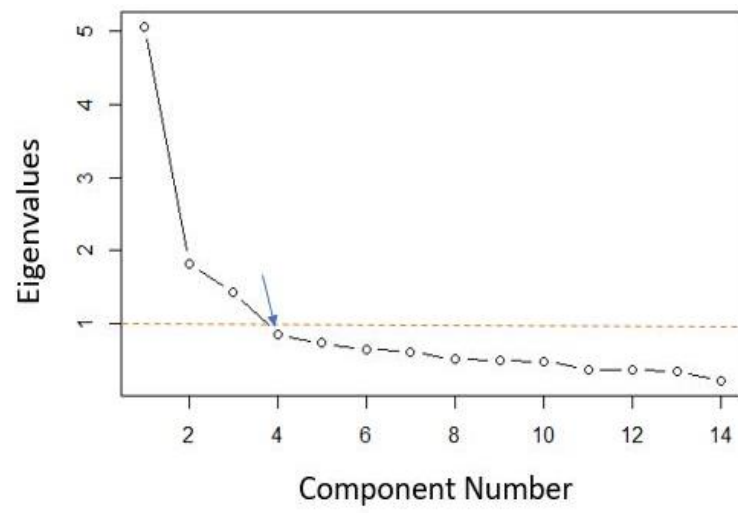

**Figure S1.** Scree test for 14 individual-level environmental factors.
